1           **Soil bacterial biomass and diversity are affected by different**  
2           **furrow-ridge mulched management systems during potato**  
3                           **continuous cropping**

4   Weina Zhang<sup>1</sup> • Shuhao Qin<sup>1\*</sup> • Xuexue Xu<sup>1</sup> • Junlian Zhang<sup>1,2</sup> • Yuhui Liu<sup>2</sup>

5

6   <sup>1</sup> College of Horticulture, Gansu Agricultural University, Lanzhou 730070, China

7   <sup>2</sup> Gansu Key Laboratory of Crop Genetic & Germplasm Enhancement, Lanzhou  
8   730070, China

9   Shuhao Qin: [qinsh@gsau.edu.cn](mailto:qinsh@gsau.edu.cn)

10   Tel.: +01186 13893135572

11 **Abstract**

12 The soil bacterial composition is vital for sustainable agriculture due to its  
13 importance in biogeochemical processes in the soil environment. Multiple  
14 management systems, such as different furrow-ridge mulched cropping systems, have  
15 been established to reduce the damage caused by continuous cropping of potato  
16 (*Solanum tuberosum* L.). However, little is known about the responses of soil  
17 bacterial biomass and diversity to these systems. In this study, six different  
18 ridge-furrow film planting patterns were tested in a 2-year continuous cropping potato  
19 field: flat plot without mulch (CK), flat plot with mulch (T1), on-ridge planting with  
20 full mulch (T2), on-furrow planting with full mulch (T3), on-ridge planting with half  
21 mulch (T4), and on-furrow planting with half mulch (T5). The soil physicochemical  
22 properties and bacterial composition were significantly affected by the planting  
23 pattern. Mulched soils, especially T2, maintained better soil physicochemical  
24 properties than controls. Fully mulched soil maintained higher bacterial biomass and  
25 diversity. Among the dominant genera, the abundances of *Nitrosomonadaceae* in T2  
26 and T4 were higher than those in the other treatments. Consequently, compared with  
27 the other treatments, on-ridge with mulching patterns resulted in better soil  
28 physicochemical properties and high bacterial biomass and diversity, which could  
29 reduce the economic losses due to potato production by continuous cropping.

30 **Keywords:** Furrow-ridge mulching; potato; bacterial diversity; bacterial biomass;  
31 community structure

## 32 **Introduction**

33 Soil microbial composition, including genetic diversity and quantity, is critical  
34 for the maintenance of soil health and quality and directly affects soil function [1].  
35 Many studies have verified that soil microbial communities influence plant growth  
36 and productivity, disease resistance, nutrient availability, ecosystem functioning, and  
37 plant-soil feedback [2]. Among soil microbes, bacteria play a pivotal role in crop  
38 production, supplying nutrients to crops, stimulating plant growth, controlling the  
39 activity of plant pathogens, and improving soil structure [3]. For potato planting, the  
40 bacteria in the soil are very important for nutrient cycling, decomposition of organic  
41 matter, and soil fertility [4]. Concerns have been raised that the alteration of soil  
42 microorganisms is one of the major consequences of potato continuous cropping [5,  
43 6]. Therefore, it is important to study the changes in soil bacterial composition and  
44 implement effective farming practices to reduce the losses caused by potato  
45 continuous cropping.

46 Potato (*Solanum tuberosum* L.) is an important food crop and plays a crucial role  
47 in the agricultural development of an entire region [7]. China is the largest potato  
48 producer worldwide and plays an increasing role in the global potato market [8].  
49 However, due to the restriction of land resources, continuous cropping is very  
50 common in China [9]. This practice affects soil physicochemical properties, which  
51 further result in a series of problems such as increases in pests and diseases, and  
52 alterations of the natural microbe balance [10-12]. Therefore, it is important to  
53 implement effective practices to reduce the losses from continuous cropping in potato  
54 production.

55 Ridge-furrow mulching planting management systems have been viewed as the  
56 simplest and most efficient means for utilizing water. Much research has focused on

57 improving and adjusting farmland moisture [13, 14]. Qiang et al. [15] showed that  
58 ridge mulching can prevent soil water evaporation, promote rainfall infiltration, and  
59 improve crop root zone soil moisture availability. Planting with mulch can greatly  
60 increase soil water storage, utilization rate of soil moisture, and soil physical and  
61 chemical properties as well as promote soil microbial breeding [16]. Shi et al. [17]  
62 demonstrated that different mulching regimes could improve the activities of catalase,  
63 urease, and invertase in the rhizosphere soil of flue-cured tobacco. The increase in  
64 catalase activity in the rhizosphere decreased H<sub>2</sub>O<sub>2</sub>-associated damage to plant growth.  
65 Changes in urease and invertase activities favored not only the transformation and  
66 absorption of soil nutrients at the early growth stage but also the normal maturation  
67 and harvesting [17].

68 Potato soil bacterial diversity cannot be determined using only traditional  
69 methods, which often underestimate soil microbial diversity [18]. With the  
70 development and adoption of molecular technologies, the Illumina MiSeq  
71 second-generation high-throughput sequencing platform, characterized by a high  
72 precision of analysis, high sensitivity, and high automation, is extensively used in the  
73 medical and microbial fields. Currently, this technique is also successfully applied in  
74 studies on microbial diversity [19, 20].

75 For various crops, previous investigations on the effects of continuous cropping  
76 on microbial composition mainly focused on farming practices without mulching.  
77 Little is known about soil bacterial diversity under different ridge-furrow mulching  
78 planting management systems after potato continuous cropping. Therefore, our study  
79 aimed to explore the biomass and diversity of the bacterial community under different  
80 management systems using a high-throughput sequencing approach. The information  
81 gained will aid in understanding the changes in soil structure caused by potato

- 82 continuous cropping and will guide in the design of effective measures to increase the
- 83 production and quality of potato crops.

## 84 **Materials and Methods**

### 85 *Environment of the experimental site*

86 The experiment was carried out at the Experiment Station (104°35'E, 35°33'N) of  
87 Dingxi Dry Farming Research Institute of Gansu Agricultural University (Dingxi,  
88 China) during 2013-2014. The region is classified as Calcaric Cambisols according to  
89 the FAO classification (FAO, 1990), and it has a typical soil of the Loess Plateau. The  
90 daily maximum temperatures of Dingxi can reach 38°C in July, whereas minimum  
91 temperatures can drop to -22°C in January. The annual average radiation is 5,929  
92 MJ/m<sup>2</sup>, sunshine is 2,477 h per year, and the average long-term annual rainfall is 402  
93 mm (1970-2014) [21]. Bacterial diversity was assessed at the Gansu Key Laboratory  
94 of Genetic & Germplasm Enhancement, Gansu Agricultural University (Lanzhou,  
95 China).

### 96 *Cropping pattern and plant materials*

97 The experiment was performed in a continuous cropping field, and 2014 was the  
98 third year of potato continuous cropping. A total of six treatments were used  
99 following the method of Qin et al. [21]: two rows of seedlings were planted on a flat  
100 plot without any mulch, row space was designed alternating 70 cm with 40 cm (CK);  
101 alternating a flat plot mulched with 70 cm plastic film with 40 cm bare land, two rows  
102 seedlings with row space of 40 cm were planted in mulched soils (T1); both a wide  
103 (70 cm) and a narrow (40 cm) ridge were fully mulched, two rows of seedlings  
104 planted on each wide ridge was designed as T2, planted in furrow as T3; alternating a  
105 fully mulched ridge (70 cm) with bare land (40 cm), two rows of seedlings planted in  
106 the mulched ridges was designed as T4, and planted in bare land as T5.

107 The black plastic film used in the experiment was 0.01 mm thick. “Xindaping”, a  
108 local main cultivar, was planted as the experimental model. The plants were sowed on

109 April 30 and harvested on October 1, 2014; each treatment was repeated three times,  
110 and a total of 18 plots were set in a random arrangement. The blocks were designed  
111 with a spacing of 2 m, plots were spaced at 1.5 m, and each covered an area of 6.6 ×  
112 10 m<sup>2</sup>. The plant row spacing and line spacing were 35 cm and 55 cm, respectively.

### 113 *Soil sample collection*

114 The soil samples were collected two weeks before the potatoes were harvested  
115 (September 14, 2014) using a dry-sterile brush to brush the surface soil from the  
116 potato root into sterile Ziploc bags after removing large particles, broken roots, and  
117 stones. The bags were then transferred to the laboratory for analysis. Some samples  
118 were placed in an ice box and stored at -80 °C until DNA extraction of soil microbes;  
119 the others were air-dried and sieved for determination of the soil physical and  
120 chemical properties. The soil was sampled at six points in each plot and then mixed  
121 into one sample.

### 122 *Microbial culture and determination*

123 The bacteria were cultured in modified peptone-beef extract medium containing  
124 3.0 g beef extract, 5.0 g peptone, 5.0 g NaCl, and 15.0 g agar, with the pH adjusted to  
125 7.0-7.2 [22]. The fungi were cultured in Rose Bengal Medium. The plate count  
126 method was used for the determination of microbial quantity.

### 127 *Soil bacterial DNA extraction*

128 Soil bacterial DNA was extracted from the three field replicates of six different  
129 ridge-furrow film planting patterns using Power Soil DNA Isolation kits (MoBio  
130 Laboratories, Inc., US) according to the manufacturer's recommendations. The  
131 quality of extracted DNA was inspected by Gold View staining after 1% agarose gel  
132 electrophoresis (AGE).

### 133 *PCR amplification and MiSeq sequencing analysis*

134 Amplifications of bacterial 16S rRNA genes were performed with an ABI  
135 GeneAmp 9700 PCR instrument with specific synthetic primers: 515F  
136 5'-GTGCCAGCMGCCGCGG-3' and 907R 5'-CCGTCAATTCMTTTR-AGTTT-3'.  
137 The PCR reaction was carried out with a total reaction volume of 20  $\mu$ l, containing 4  
138  $\mu$ l 5 $\times$ FastPfu Buffer, 2  $\mu$ l 2.5 mM dNTPs, 0.8  $\mu$ l Forward Primer (5  $\mu$ M), 0.8 ml  
139 Reverse Primer (5  $\mu$ M), 0.4  $\mu$ l FastPfu Polymerase, and 10 ng purified soil DNA as  
140 the template, with ddH<sub>2</sub>O added. The PCR program consisted of an initial  
141 denaturation step of 95°C for 3 min, followed by 27 cycles at 95°C for 30 s, 55°C for  
142 30 s, and 72°C for 45 s and a final extension step at 72°C for 10 min. The triplicate  
143 PCR products were assessed with 2% agarose gel electrophoresis, purified using an  
144 AxyPrepDNA gel recovery kit (Axygen Inc., Union City, CA, USA), and quantified  
145 after the product was eluted with Tris-HCl. High-throughput sequencing was  
146 performed using Illumina MiSeq platforms at the Gansu Key Laboratory of Crop  
147 Genetic and Germplasm Enhancement.

#### 148 *Statistical analysis*

149 The 16S rDNA sequences of the six treatments were optimized on the basis of  
150 the overlapping relationship between PE reads, and then, pair-reads were merged as a  
151 single sequence. Operational taxonomic units (OTUs) were defined by a 3%  
152 difference, and each OTU represented a type sequence [23]. The most similar  
153 bacterial species were found in GenBank using BLAST searches. Bacterial diversity  
154 was assessed using species richness, characterized as the number of species  
155 (<https://www.mothur.org/wiki/Chao>); the Shannon-Wiener diversity index, defined as  
156 species diversity in a community (<https://www.mothur.org/wiki/Shannon>); and  
157 sequencing depth, measured with Mothur. Moreover, principal component analysis  
158 (PCA) was performed using CANOCO software for Windows 4.5 to establish



159 possible relationships among soil bacterial community distribution for the different  
160 planting patterns.

161 Statistical analyses of the data were performed using Origin 8.0 (Microcal  
162 Software, Northampton, MA, USA), SPSS statistical software version 10.0, and the  
163 Student's t-test ( $P < 0.05$  was considered significant).

## 164 **RESULTS**

### 165 *Effects of planting patterns on soil physicochemical properties*

166 The physicochemical properties of the soil profiles for the six different planting  
167 patterns are summarized in Table 1. High levels of relative water content were  
168 detected for on-ridge and on-furrow planting with mulching (T2, T3, T4, and T5).  
169 Compared to the other treatments, a more moderate pH value and a lower electrical  
170 conductivity (EC) value were observed for T3 and T2, respectively. Among all six  
171 planting patterns, T2 had the highest available nitrogen (N) content; CK, T3, and T5  
172 had the highest available potassium (K) levels; and T3 had the highest available  
173 phosphorus (P) level. These results indicated that the physicochemical properties were  
174 significantly affected by the different planting patterns, among which the mulched  
175 patterns performed better than that the control.

### 176 *Effects of planting patterns on soil bacterial biomass*

177 The soil bacterial biomass results at three time points for the six investigated  
178 treatments are shown in Table 2. Soil bacterial numbers varied from 42.9 to 74.5, 74.6  
179 to 138.5, and 54 to  $109.7 \times 10^5$  CFU·g<sup>-1</sup> on April 13, July 8, and September 15,  
180 respectively. A higher level of soil bacterial biomass was found on July 8 among the  
181 three time points. For all treatments, soil bacterial numbers ranked in the order of T2  
182 > T4 > T5 > T3 > T1 > CK on Apr 13, T2 > T3 > T4 > T5 > CK > T1 on July 8, and  
183 T2 > T5 > T4 > T3 > T1 > CK on September 15. The results revealed that the number  
184 of bacteria first increased and then decreased, and the highest levels were found for  
185 T2 at all three time points. These results indicated that on-ridge planting with full  
186 mulch is beneficial for soil bacterial biomass.

### 187 *16S rDNA optimizing sequence statistics*

188 Following quality and length filtration, 183,389 reads of 16S rDNA were

189 obtained, with a total length of 72,683,859 bp and an average length of 396.34 bp.  
190 From each sample, the number of obtained optimized sequences varied from 9,876 to  
191 20,291 and ranked in the order of T1 > T2 > T5 > CK > T4 > T3.

#### 192 *Soil bacterial diversity indices and richness*

193 The bacterial species richness and diversity results for the six different planting  
194 patterns are shown in Table 3. More than 90% of the coverage indices indicated that  
195 the true bacterial diversity in the tested samples was reflected by the sequencing  
196 results at a similarity level of 0.03. The Chao value indicated the richness of the  
197 bacterial diversity in soil. In the early stage (8-July), the bacterial richness was not  
198 affected by the planting patterns (data not shown). However, at a later growth stage  
199 (15-September), the bacterial richness in all tested soils was higher than that in CK.  
200 Two fully mulched planting patterns had higher bacterial richness values than those of  
201 the other planting patterns, which ranked as T3 > T2 > T1 > T5 > T4 > CK. In  
202 addition, the diversity of the microbial community from each sample was estimated  
203 using the Shannon-Wiener index. In the early stage, the bacterial diversity from all  
204 tested samples was higher than that of the control (data not shown). At a later growth  
205 stage, the highest bacterial diversity was also observed for fully mulched planting  
206 patterns (T2 and T3) among all samples (T2 > T3 > T5 > T1 > T4 > CK). Thus, the  
207 bacterial richness and diversity were significantly affected by planting patterns, and  
208 two fully mulched planting patterns (T2 and T3) had the highest bacteria diversity.

#### 209 *Bacterial community composition in soil*

210 The bacteria were classified into 33 phyla, 73 classes, 163 orders, and 439 genera.  
211 At the phylum level, bacteria in continuous cropping soil mainly included  
212 *Acidobacteria*, *Actinobacteria*, *Bacteroidetes*, *Proteobacteria*, *Planctomycetes*,  
213 *Gemmatimonadetes*, *Verrucomicrobia*, *Chloroflexi*, and *Firmicutes* (Figure 1).

214 Among them, *Acidobacteria* and *Proteobacteria* were the dominant communities,  
215 followed by *Bacteroidetes* and *Planctomycetes*. The taxonomic composition of  
216 *Acidobacteria* in the six treatments varied from 26.0 to 31.4%, in the order of T4 >  
217 CK > T3 > T2 > T1 > T5. *Proteobacteria* varied from 23.2 to 34.5%, in the order of  
218 T5 > CK > T4 > T3 > T2 > T1. The proportion of *Bacteroidetes* varied from 11.4 to  
219 16.0%, whereas that of *Planctomycetes* varied between 7.8 and 9.2%.

220 The color gradients and similarity degrees in the heatmap shown in Figure 2  
221 indicate the diversity and richness of the bacterial communities of the six tested soils.  
222 The bacteria in continuous cropping soils were classified into 439 genera, including  
223 *Subgroup\_6\_norank*, *Blastocatella*, *Bryobacter*, *Chryseolinea*, *Cytophagaceae*,  
224 *Gemmatimonadaceae*, *Steroidobacter*, and *Xanthomonadales*. *Subgroup\_6\_norank* in  
225 the six tested soils varied from 14.0% to 20.2%. Among the different planting patterns,  
226 the abundances of the genera for most of the mulched soils (T1, T2, T3, and T4,  
227 accounting for 19.2 to 20.22%) were higher than that in the control (CK, 18.77%).  
228 Other dominant genera were *RB41\_norank*, *WD2101\_soil\_group\_norank*,  
229 *Nitrosomonadaceae*, *Cytophagaceae*, *Xanthomonadales*, *Gemmatimonadaceae*,  
230 *Anaerolineaceae*, and *Nitrospira*, and the average abundance of the six samples  
231 changed from 2.2% (*Nitrospira*) to 4.12% (*Nitrosomonadaceae\_uncultured*). The  
232 abundances of *Nitrosomonadaceae\_uncultured*, *Cytophagaceae\_uncultured*,  
233 *Xanthomonadales\_uncultured*, and *Anaerolineaceae\_uncultured* were higher for the  
234 on-ridge and on-furrow planting patterns (T2, T3, T4, and T5) than for the others (CK  
235 and T1). In addition, the abundances of *Nitrosomonadaceae\_uncultured* for the ridge  
236 planting pattern (T2 and T4, accounting for 5.09 and 5.09%) were higher than those  
237 for the furrow (T3 and T5, accounting for 4.93 and 3.83%) and other planting patterns  
238 (CK and T1, accounting for 2.72 and 3%).

239 Cluster analysis at the genera level revealed that the bacterial compositions in the  
240 soils from the different treatments could be classified into two groups: CK and T1 and  
241 T2, T3, T4, and T5. This indicates obvious differences in bacterial diversity and  
242 richness between mulched ridge cropping and flat cropping.

243 *PCA of the soil bacterial community in different furrow-ridge mulching planting*  
244 *patterns*

245 The first three (PC1, PC2, and PC3) components accounted for 34.85%, 19.14%,  
246 and 12.89% with a whole variance of 66.88% (Figure 3). The large interval  
247 distribution of the data points between different treatments indicates the obvious  
248 effects of the different management systems on the composition of the bacterial  
249 community in the soil. Therefore, the PCA results confirmed that different  
250 furrow-ridge mulching planting patterns can change the soil quality, resulting in  
251 variations in the soil bacterial profile (Figure 3).

252 *Yield of potato*

253 Compared with the control (CK), all five mulched cropping systems exhibited a  
254 significant increase in potato yield in both 2013 and 2014. The yield could be ranked  
255 as T1 > T2 > T3 > T4 > T5 > CK in 2013 and T2 > T1 > T4 > T5 > T3 > CK in 2014.  
256 The yield from CK decreased in 2014 compared with 2013; however, other treatments  
257 showed no change or obvious trends of increase.

## 258 **Discussion**

259 Continuous cropping is very common and has drawn public attention in China  
260 [24]. It is imperative to understand the mechanism of the damage caused by  
261 continuous cropping and take measures to reduce the losses that result from it. The  
262 mechanism of the damage caused by crop continuous cropping is very complicated,  
263 although an imbalance in the structure of the soil microbial population is the main  
264 factor [25]. Changing the biomass of soil bacteria and the structure of the microbial  
265 community can negatively affect microbial function, leading to decreases in soil  
266 nutrients and fertility [26, 27]. Our results showed that both bacterial biomass and  
267 composition were markedly affected by mulching during the process of potato  
268 continuous cropping.

269 Over a long period of continuous cropping, the number of soil bacteria and  
270 actinomycetes sharply decrease, whereas that of fungi increases [28, 29]. Soil fertility  
271 can change from “bacterial” to “fungal” conditions. “Fungal” soil causes more serious  
272 soil diseases, mainly because of the enrichment of certain microbial populations,  
273 especially plant pathogenic fungi, which are not conducive to the soil microbial  
274 population balance but are conducive to plant root diseases [30]. This type of change  
275 in soil conditions might be an important factor responsible for the loss of potato  
276 production and quality [31]. Our results indicated that a high level of bacterial  
277 biomass in the soil was associated with fully mulched practices, especially full mulch  
278 with an on-ridge pattern (T2) (Table 2 and Table 3). Interestingly, our results also  
279 revealed a lower level of fungal biomass in most potato growth periods from fully  
280 mulched soils (Table 4). Thus, the decrease in bacterial biomass and increase in  
281 fungal biomass could possibly be directly or indirectly prevented by using mulching  
282 management. Moreover, we also verified that the soil from T2 maintained better soil

283 fertility, such as a higher relative water content, moderate pH value, lower electrical  
284 conductivity, and higher available nitrogen and phosphorus (Table 1). Wang et al. [32]  
285 reported similar results regarding the effects of the plastic film cultivation pattern on  
286 soil fertility. Therefore, we conclude that fully mulched practices help maintain a  
287 higher bacterial biomass and soil fertility during the process of continuous cropping.

288 Farming management practices have been shown to affect the structure of the  
289 microbial community [33]. In our previous study, we found that different  
290 furrow-ridge mulching management systems significantly affected soil fungal  
291 diversity [21]. Similarly, different systems also markedly affected bacterial diversity,  
292 although common dominant bacteria were found in the different mulched soils both at  
293 the phylum and genus levels (Figures 1, 2, and 3). The composition of dominant  
294 bacteria at the phylum level was consistent with previous investigations [19; 34, 35],  
295 further indicating the high reliability of the data from this study. *Nitrosomonadaceae*,  
296 a dominant genus in continuous potato cropping soil, comprise a monophyletic  
297 phylogenetic group within *betaproteobacteria* [36, 37]. All these cultivated  
298 representatives are lithoautotrophic ammonia oxidizers and are crucial for soil  
299 function [38, 39, 40]. Interestingly, the richness of *Nitrosomonadaceae* in soil from  
300 on-ridge planting with full or half mulch (T2 and T4, accounting for 5.09 and 5.09%)  
301 was much higher than that in the control treatment (CK). *Nitrosomonadaceae* plays  
302 major roles in controlling the nitrogen cycle in terrestrial, freshwater, and marine  
303 environments and in wastewater treatment processes [36, 41, 42]. This also explains  
304 why the soil from the on-ridge planting with mulch system had higher available  
305 nitrogen content (Table 1). Additionally, although the functions of most of the other  
306 genera regarding soil nutrients and fertility are currently not clear, our results from the  
307 PCA confirmed the clear effect of different furrow-ridge mulching management

308 systems on diversity at the genus level (Figure 3). Furthermore, we have confirmed  
309 higher potato production from both furrow and ridge mulched soils (Figure. 4). In  
310 summary, these results indicate that the beneficial effects on bacterial diversity from  
311 mulched soils also benefit soil fertility and potato production during the process of  
312 potato continuous cropping.

313 In conclusion, different furrow-ridge mulching management systems clearly  
314 affected soil physicochemical properties, bacterial biomass, and bacterial diversity  
315 during the process of potato continuous cropping. Mulched soil, especially on-ridge  
316 planting with full mulch (T2), maintained better soil fertility and higher bacterial  
317 biomass than controls. A higher proportion of *Nitrosomonadaceae* was found in  
318 furrow-ridge mulched soils than in the control group. These changes affected both the  
319 soil function and reduced the loss of potato production due to the effects of  
320 continuous cropping.

#### 321 **Author Contributions**

322 SQ and WZ conceived the study and participated in its design and prepared the  
323 manuscript. WZ and XX performed the experiments and collected, analyzed, and  
324 deposited the data. JZ and YL edited the final draft and revised the manuscript. All  
325 authors have read and approved the manuscript.

#### 326 **Funding**

327 This research was supported by National Natural Science Foundation of China  
328 (31260311), China Postdoctoral Science Foundation (2012M512042 and  
329 2014T70942), and the Ministry of Agriculture (CARS-09-P14).

#### 330 **Conflict of Interest Statement**

331 The authors declare that the research was conducted in the absence of any  
332 commercial or financial relationships that could be construed as a potential conflict of



333 interest.

### 334 **Acknowledgments**

335 We sincerely thank all the students and staff of Dingxi Rainfed Agricultural  
336 Research Institute for their assistance with the field work.

### 337 **Ethical statement**

338 This article does not contain any studies with human participants performed by  
339 any of the authors.

### 340 **References**

- 341 [1] Masciandaro G, Macci C, Peruzzi E, et al. Organic matter–microorganism–plant  
342 in soil bioremediation: a synergic approach. *Rev Environ Sci Bio/Technol*; 2013,  
343 12: 399-419.
- 344 [2] Lau J A, Lennon J T. Evolutionary ecology of plant–microbe interactions: soil  
345 microbial structure alters selection on plant traits. *New Phytol*; 2011, 192:  
346 215-224.
- 347 [3] Hayat R, Ali S, Amara U, et al. Soil beneficial bacteria and their role in plant  
348 growth promotion: a review. *Ann Microbiol*; 2010, 60: 579-598.
- 349 [4] Doran J, Zeiss M. Soil health and sustainability managing the biotic component of  
350 soil quality. *App Soil Ecol*; 2000, 15: 3-11.
- 351 [5] Rani A, Powal S, Shama R. Assessing microbial diversity by culture-dependent  
352 and independent approaches for efficient functioning of effluent treatment plants.  
353 *Bioresource Technol*; 2008, 99: 7098-7107.
- 354 [6] Xiong W, Zhao Q, Zhao J, Xun W, Li R, Zhang R, Wu H, Shen Q. Different  
355 Continuous Cropping Spans Significantly Affect Microbial Community  
356 Membership and Structure in a Vanilla-Grown Soil as Revealed by Deep  
357 Pyrosequencing. *Microb Ecol*; 2015, 70: 209-218.

- 358 [7] Hermansen A, Lu D, Forbes G. Potato Production in China and Norway:  
359 Similarities, Differences and Future Challenges. *Potato Res*; 2012, 55: 197-203.
- 360 [8] Wang Q, Zhang W. An economic analysis of potato demand in China. *Am J*  
361 *Potato Res*; 2010, 87: 245-252.
- 362 [9] Miao Y, Stewart B, Zhang F. Long-term experiments for sustainable nutrient  
363 management in China, A review. *Agron Sustain Dev*; 2011, 31: 397-414.
- 364 [10] Gao Q, Meng X, Yu H. Reason analysis and control methods of succession  
365 cropping obstacle. *Shandong Agr Sci*; 2006, 3: 60-63.
- 366 [11] Larkin R, Honeycutt C, Griffin T, Olanya O, Halloran J, He Z. Effects of  
367 different potato cropping system approaches and water management on soilborne  
368 diseases and soil microbial communities. *Phytopathol*; 2011, 101: 58-67.
- 369 [12] Liu E, Yan C, Mei X, He W, Bing S, Ding L, Liu Q, Liu S, Fan T. Long-term  
370 effect of chemical fertilizer, straw, and manure on soil chemical and biological  
371 properties in northwest China. *Geoderma*; 2010, 158: 173-180.
- 372 [13] Hou F, Zhang L, Xie B, Dong S, Zhang H, Li A, Wang Q. Effect of plastic  
373 mulching on the photosynthetic capacity, endogenous hormones and root yield of  
374 summer-sown sweet potato (*Ipomoea batatas* (L). Lam.) in Northern China. *Acta*  
375 *Physiol Plant*; 2015, 37: 164.
- 376 [14] Katarzyna R, Franciszek B, Renata G, Tomasz F. Effects of Cover Type and  
377 Harvest Date on Yield, Quality and Cost-Effectiveness of Early Potato  
378 Cultivation. *Ame J Potato Res*; 2015, 92: 359-366.
- 379 [15] Qiang S, Zhang H, Mo F, Zhao H, Zhou H, Xiong Y. The effect of  
380 micro-rainwater harvesting pattern and rainfall variability on water ecological  
381 stoichiometry in oat (*Avena sativa* L) field. *Acta Ecol Sin*; 2011, 31: 2366-2370.
- 382 [16] Zhang L, Niu J, Zhao F. Research of film mulching model in dryland mazie

- 383 region for improving utilization ratio of precipitation. *Agr Res Arid Areas*; 2006,  
384 24: 8-11.
- 385 [17] Shi X, Geng W, Li N, Jiao F, Zhi L. An investigation into the dynamic of  
386 rhizosphere soil nutrient and enzyme activity in flue-cured tobacco under  
387 different mulching regimes. *Acta Tabacaria Sin*; 2010, 16: 50-54.
- 388 [18] Klingler J, Stowe R, Obenhuber D, Groves T, Mishra S, Pierson D. Evaluation of  
389 the Biology automated microbial identification system. *Appl Environ Microbiol*;  
390 1992, 58: 2089-2092.
- 391 [19] Lauber C, Hamady M, Knight R, Fierer N. Pyrosequencing-based assessment of  
392 soil pH as a predictor of soil bacterial community structure at the continental  
393 scale. *Appl Environ Microbiol*; 2009, 75: 5111-5120.
- 394 [20] Sogin M, Morrison H, Huber J, Welch D, Huse S, Neal P, Arrieta J, Herndl G.  
395 Microbial diversity in the deep sea and the underexplored “rare biosphere”.  
396 *PNAS*; 2006, 103: 12115-12120.
- 397 [21] Qin S, Yeboah S, Xu X, Liu Y, Yu B. Analysis on fungal diversity in rhizosphere  
398 soil of continuous cropping potato subjected to different furrow-ridge mulching  
399 managements. *Front microbial*; 2017, 8.
- 400 [22] Shivaji S, Madhu S, Singh S. Extracellular synthesis of antibacterial silver  
401 *nanoparticles* using *psychrophilic* bacteria. *Process Biochem*; 2011, 46:  
402 1800-1807.
- 403 [23] Edgar RC. UPARSE: highly accurate OTU sequences from microbial amplicon  
404 reads. *Nat methods*; 2013, 10: 996-998.
- 405 [24] Liu X, Liu J, Xing B, Herbert S, Meng K, Han X, Zhang X. Effects of long-term  
406 continuous cropping, tillage, and fertilization on soil organic carbon and nitrogen  
407 of black soils in China. *Commun Soil Sci Plan*; 2005,36: 1229-1239.

- 408 [25] Ma Y, Wei M, Wang X. Variation of microflora and enzyme activity in  
409 continuous cropping cucumber soil in solar greenhouse. *Chin J Appl Eco*; 2004,  
410 15: 1005-1008.
- 411 [26] Chen G, Mi B, Li Y, Li C. The effect of transgenic cucumber with double strands  
412 RNA of mapk on diversity of rhizosphere bacteria. *Acta Ecol Sinica*; 2013, 33:  
413 1091-1097.
- 414 [27] Mohata B, Lemka D, Naik D. Effect of plastic mulching on yield and water use  
415 efficiency in maize. *Ann Agric Res*; 1998, 19: 210-211.
- 416 [28] Li P, Dai C, Wang X. Variation of soil enzyme activities and microbial  
417 community structure in peanut monocropping system in subtropical China. *Afr J*  
418 *Agric Res*; 2012, 7: 1870-1879.
- 419 [29] Zhao M, Li M, Wang M, Wang Y, Zhang X. Effects of watermelon replanting on  
420 main microflora of rhizosphere and activity of soil enzymes. *Microbiol*; 2008, 35:  
421 1251-1254.
- 422 [30] Ghorbani R, Wilcockson S, Koocheki A, Leifert C. Soil management for  
423 sustainable crop disease control: a review. *Environ Chem Lett*; 2008, 6: 149-162.
- 424 [31] Weller DM, Raaijmakers JM, Gardener BBM, Thomashow LS. Microbial  
425 populations responsible for specific soil suppressiveness to plant  
426 pathogens. *Annu Rev Phytopathol* ; 2002, 40: 309-348.
- 427 [32] Wang H, Guo X, Ma M. Effect of soil microorganism regions and soil fertility of  
428 soybean rootsystem with film mulching between rows. *Soybean Sci*; 2009, 28:  
429 8-11.
- 430 [33] Girvan M, Bullimore J, Pretty J, Osborn A, Ball A. Soil type is the primary  
431 determinant of the composition of the total and active bacterial communities in  
432 arable soils. *Appl Environ Microbiol*; 2003, 69: 1800-1809.

- 433 [34] Janssen P. Identifying the dominant soil bacterial taxa in libraries of 16S rRNA  
434 and 16S rDNA genes. *Appl Environ Microbiol*; 2006, 72: 1719-1728.
- 435 [35] Spain A, Krumholz L, Elshahed M. Abundance, composition, diversity and  
436 novelty of soil Proteobacteria. *ISME J*; 2009, 3: 992-1000.
- 437 [36] Prosser J, Head I, Stein L. The family *nitrosomonadaceae*, In *The prokaryotes*,  
438 Springer Berlin Heidelberg; 2014, 901-918.
- 439 [37] Dang H, Chen R, Wang L, Guo L, Zhang Z, Klotz M. Diversity, abundance, and  
440 spatial distribution of sediment ammonia-oxidizing *Betaproteobacteria* in  
441 response to environmental gradients and coastal eutrophication in Jiaozhou Bay,  
442 China. *Appl Environ Microbiol*; 2010, 76: 4691-4702.
- 443 [38] Webster G, Embley T, Freitag T, Smith Z, Prosser J. Links between ammonia  
444 oxidizer species composition, functional diversity and nitrification kinetics in  
445 grassland soils. *Environ Microbiol*; 2005, 7: 676-684.
- 446 [39] Jia Z, Conrad R. Bacteria rather than Archaea dominate microbial ammonia  
447 oxidation in an agricultural soil. *Environ microbial*; 2009, 11: 1658-1671.
- 448 [40] He J, Hu H, Zhang L. Current insights into the autotrophic thaumarchaeal  
449 ammonia oxidation in acidic soils. *Soil Biol Biochem*; 2012, 55: 146-154.
- 450 [41] Zheng W, Gong Q, Zhao Z, Liu J, Zhai B, Wang Z, Li Z. Changes in the soil  
451 bacterial community structure and enzyme activities after intercrop mulch with  
452 cover crop for eight years in an orchard. *Eur J Soil Biol*; 2018, 86: 34-41.
- 453 [42] Monreal C, Zhang J. An ecological function conceptual model for bacterial  
454 communities with high relative abundance in an unplanted and canola (*Brassica*  
455 *napus*) planted Podzol. *Rhizosphere*; 2018, 5: 26-31.

456 **Table 1** Physicochemical properties of soil profile

| Treatment | Relative water content /% | pH     | Electrical conductivity (EC) ( $\mu\text{s}/\text{cm}$ ) | Available nitrogen ( $\text{mg}\cdot\text{kg}^{-1}$ ) | Available potassium ( $\text{mg}\cdot\text{kg}^{-1}$ ) | Available phosphorus ( $\text{mg}\cdot\text{kg}^{-1}$ ) |
|-----------|---------------------------|--------|----------------------------------------------------------|-------------------------------------------------------|--------------------------------------------------------|---------------------------------------------------------|
| CK        | 7.26b                     | 7.74a  | 284ab                                                    | 15.0ab                                                | 236a                                                   | 26.0b                                                   |
| T1        | 8.90ab                    | 7.64ab | 276ab                                                    | 12.4c                                                 | 124b                                                   | 29.2ab                                                  |
| T2        | 11.04a                    | 7.45ab | 232a                                                     | 16.6a                                                 | 112b                                                   | 38.7ab                                                  |
| T3        | 10.51a                    | 7.29b  | 241a                                                     | 12.1c                                                 | 137ab                                                  | 40.4a                                                   |
| T4        | 10.25a                    | 7.47ab | 244a                                                     | 14.7b                                                 | 107b                                                   | 26.6ab                                                  |
| T5        | 10.54a                    | 7.56ab | 283ab                                                    | 16.5a                                                 | 152ab                                                  | 36.5ab                                                  |

457 **Table 2** Effect of soil bacterial number under different ridge-furrow film continuous  
458 planting patterns

| Treatment | Bacterial number ( $\times 10^5$ CFU·g <sup>-1</sup> ) |         |        |
|-----------|--------------------------------------------------------|---------|--------|
|           | Apr-13                                                 | Jul-8   | Sep-15 |
| CK        | 42.9c                                                  | 88.4de  | 54.0c  |
| T1        | 57.4b                                                  | 74.6e   | 67.1bc |
| T2        | 74.5a                                                  | 138.5a  | 109.7a |
| T3        | 58.2b                                                  | 127.0ab | 74.7b  |
| T4        | 64.3b                                                  | 112.3bc | 82.1b  |
| T5        | 62.2b                                                  | 98.9cd  | 82.8b  |

459 **Table 3** Diversity and richness of soil bacterial community in different furrow-ridge  
460 mulching planting patterns (15-September)

| Planting patterns | OUT number | Chao<br>richness | Shannon-Wiener<br>diversity | Coverage/% |
|-------------------|------------|------------------|-----------------------------|------------|
| CK                | 1384       | 1473b            | 5.97d                       | 97.41      |
| T1                | 1350       | 1624ab           | 6.05bc                      | 97.22      |
| T2                | 1344       | 1670a            | 6.14a                       | 97.31      |
| T3                | 1102       | 1677a            | 6.12a                       | 94.48      |
| T4                | 1206       | 1537ab           | 6.02cd                      | 95.55      |
| T5                | 1334       | 1613ab           | 6.09ab                      | 97.41      |

461 *Different letters represent significant difference ( $P < 0.05$ ).*



462 **Table 4** Effect of soil fungal number under different ridge-furrow film continuous  
463 planting patterns

| Treatment | Numbers of fungus ( $\times 10^2 \text{CFU} \cdot \text{g}^{-1}$ ) |        |        |
|-----------|--------------------------------------------------------------------|--------|--------|
|           | Apr-13                                                             | Jul-8  | Sep-15 |
| CK        | 90.1c                                                              | 117.8a | 63.6b  |
| T1        | 79.1c                                                              | 43.8cd | 69.2ab |
| T2        | 17.8e                                                              | 54.1c  | 73.8a  |
| T3        | 43.6d                                                              | 38.7d  | 62b    |
| T4        | 111.5b                                                             | 48.4cd | 59.9b  |
| T5        | 145.5a                                                             | 66.3b  | 66.4ab |

464 **Figure legends**

465 **Figure 1** Bacterial phyla in the soils from the different planting patterns.

466 **Figure 2** Heatmap of soil bacterial genera in the different soils. Based on the vertical  
467 and horizontal clustering, the results are presented as operational taxonomic units  
468 (OTUs) in the figure. A detailed statistical analysis at the OTU level, representing  
469 bacterial species, revealed a complex community structure of the rhizosphere. The  
470 similarities and differences in community composition from different samples under  
471 the classification level are reflected by the color gradient and similar degrees.

472 **Figure 3** Principal component analysis (PCA) of the soil bacterial community in the  
473 different soils.

474 **Figure 4** Yield of potato from different treatments. Asterisks indicate a significant  
475 difference from the control in the same year at  $P < 0.05$  (\*) and  $P < 0.01$  (\*\*).

476

**Similarity****Taxonomic composition****Taxon**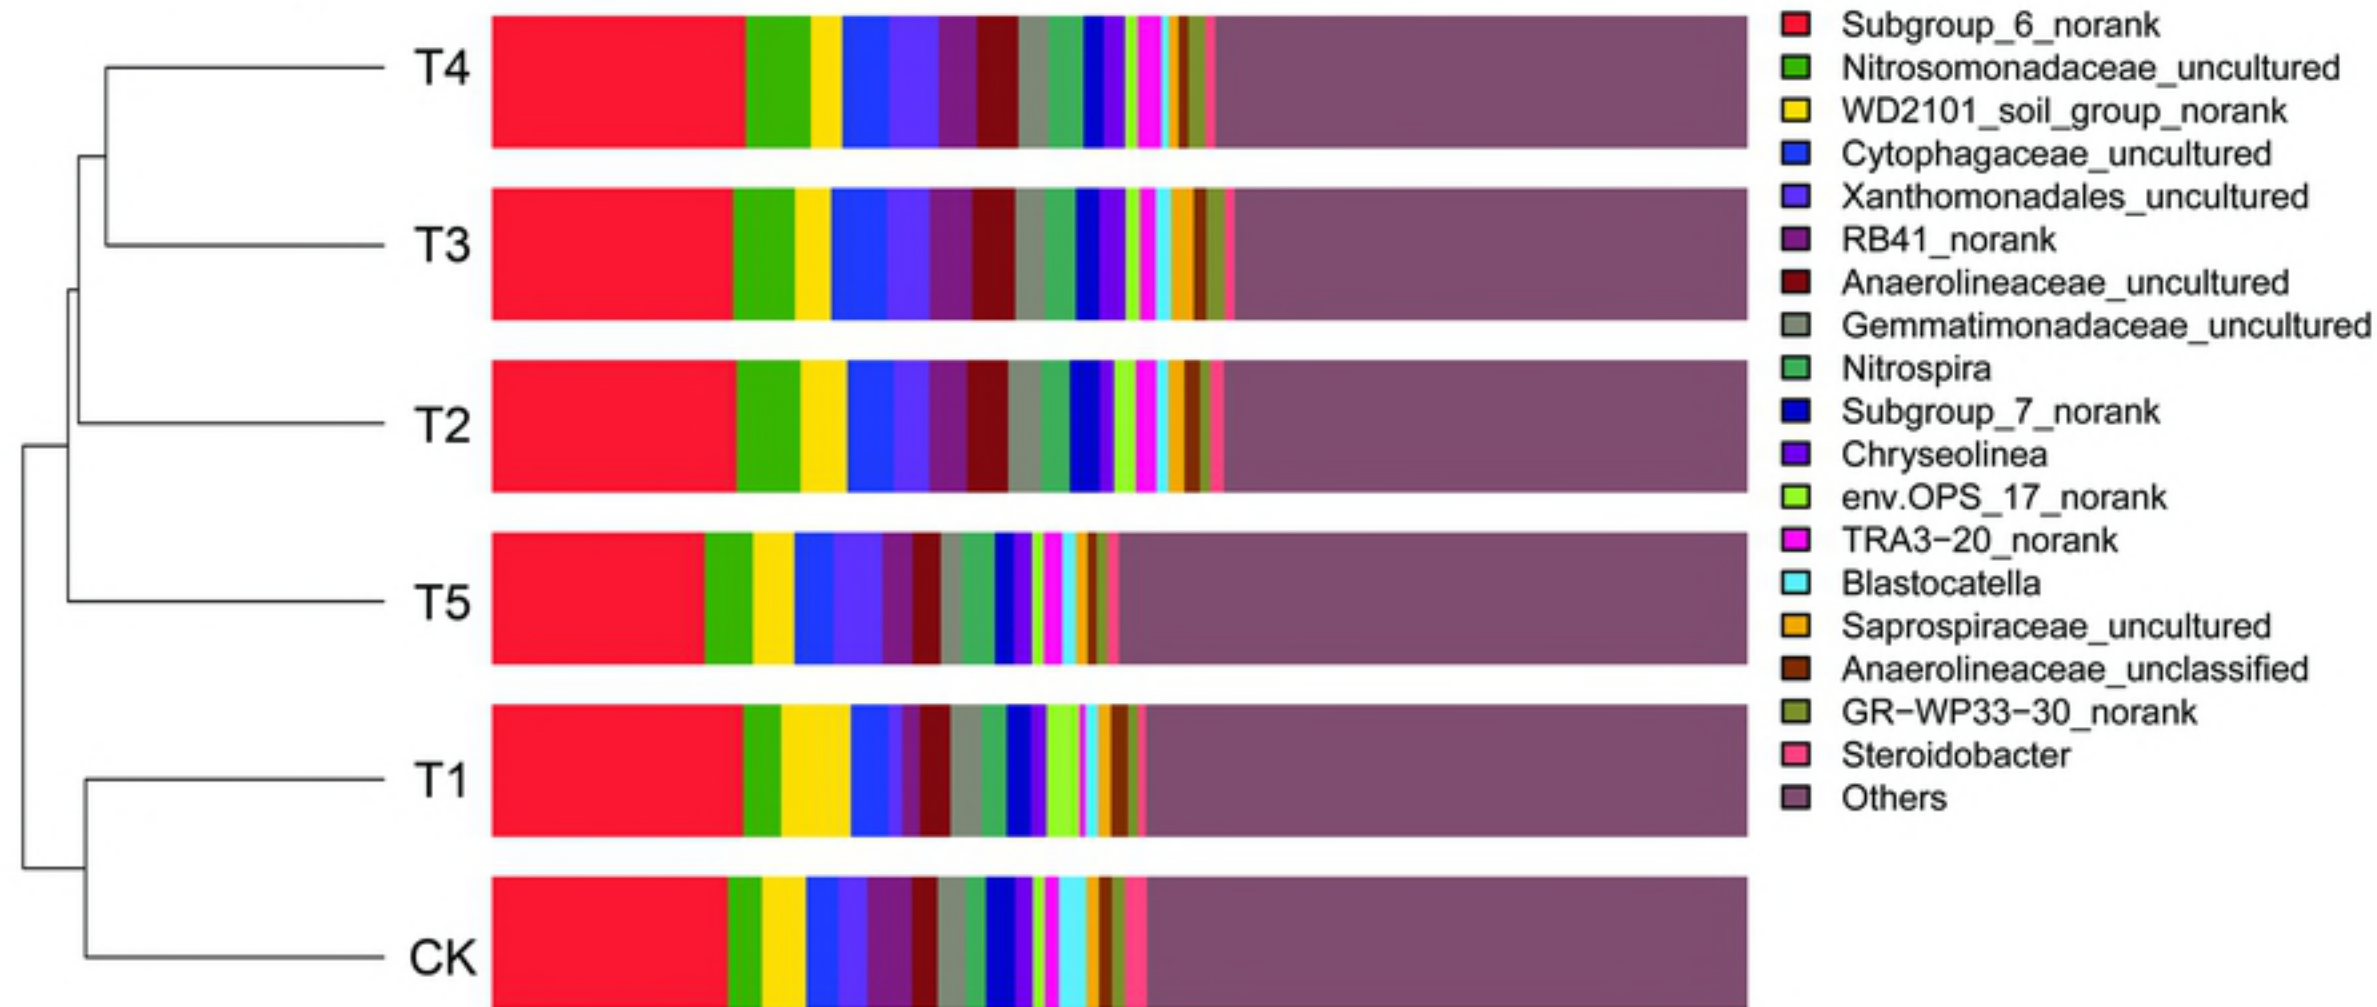

bioRxiv preprint doi: <https://doi.org/10.1101/394551>; this version posted August 17, 2018. The copyright holder for this preprint (which was not certified by peer review) is the author/funder, who has granted bioRxiv a license to display the preprint in perpetuity. It is made available under aCC-BY 4.0 International license.

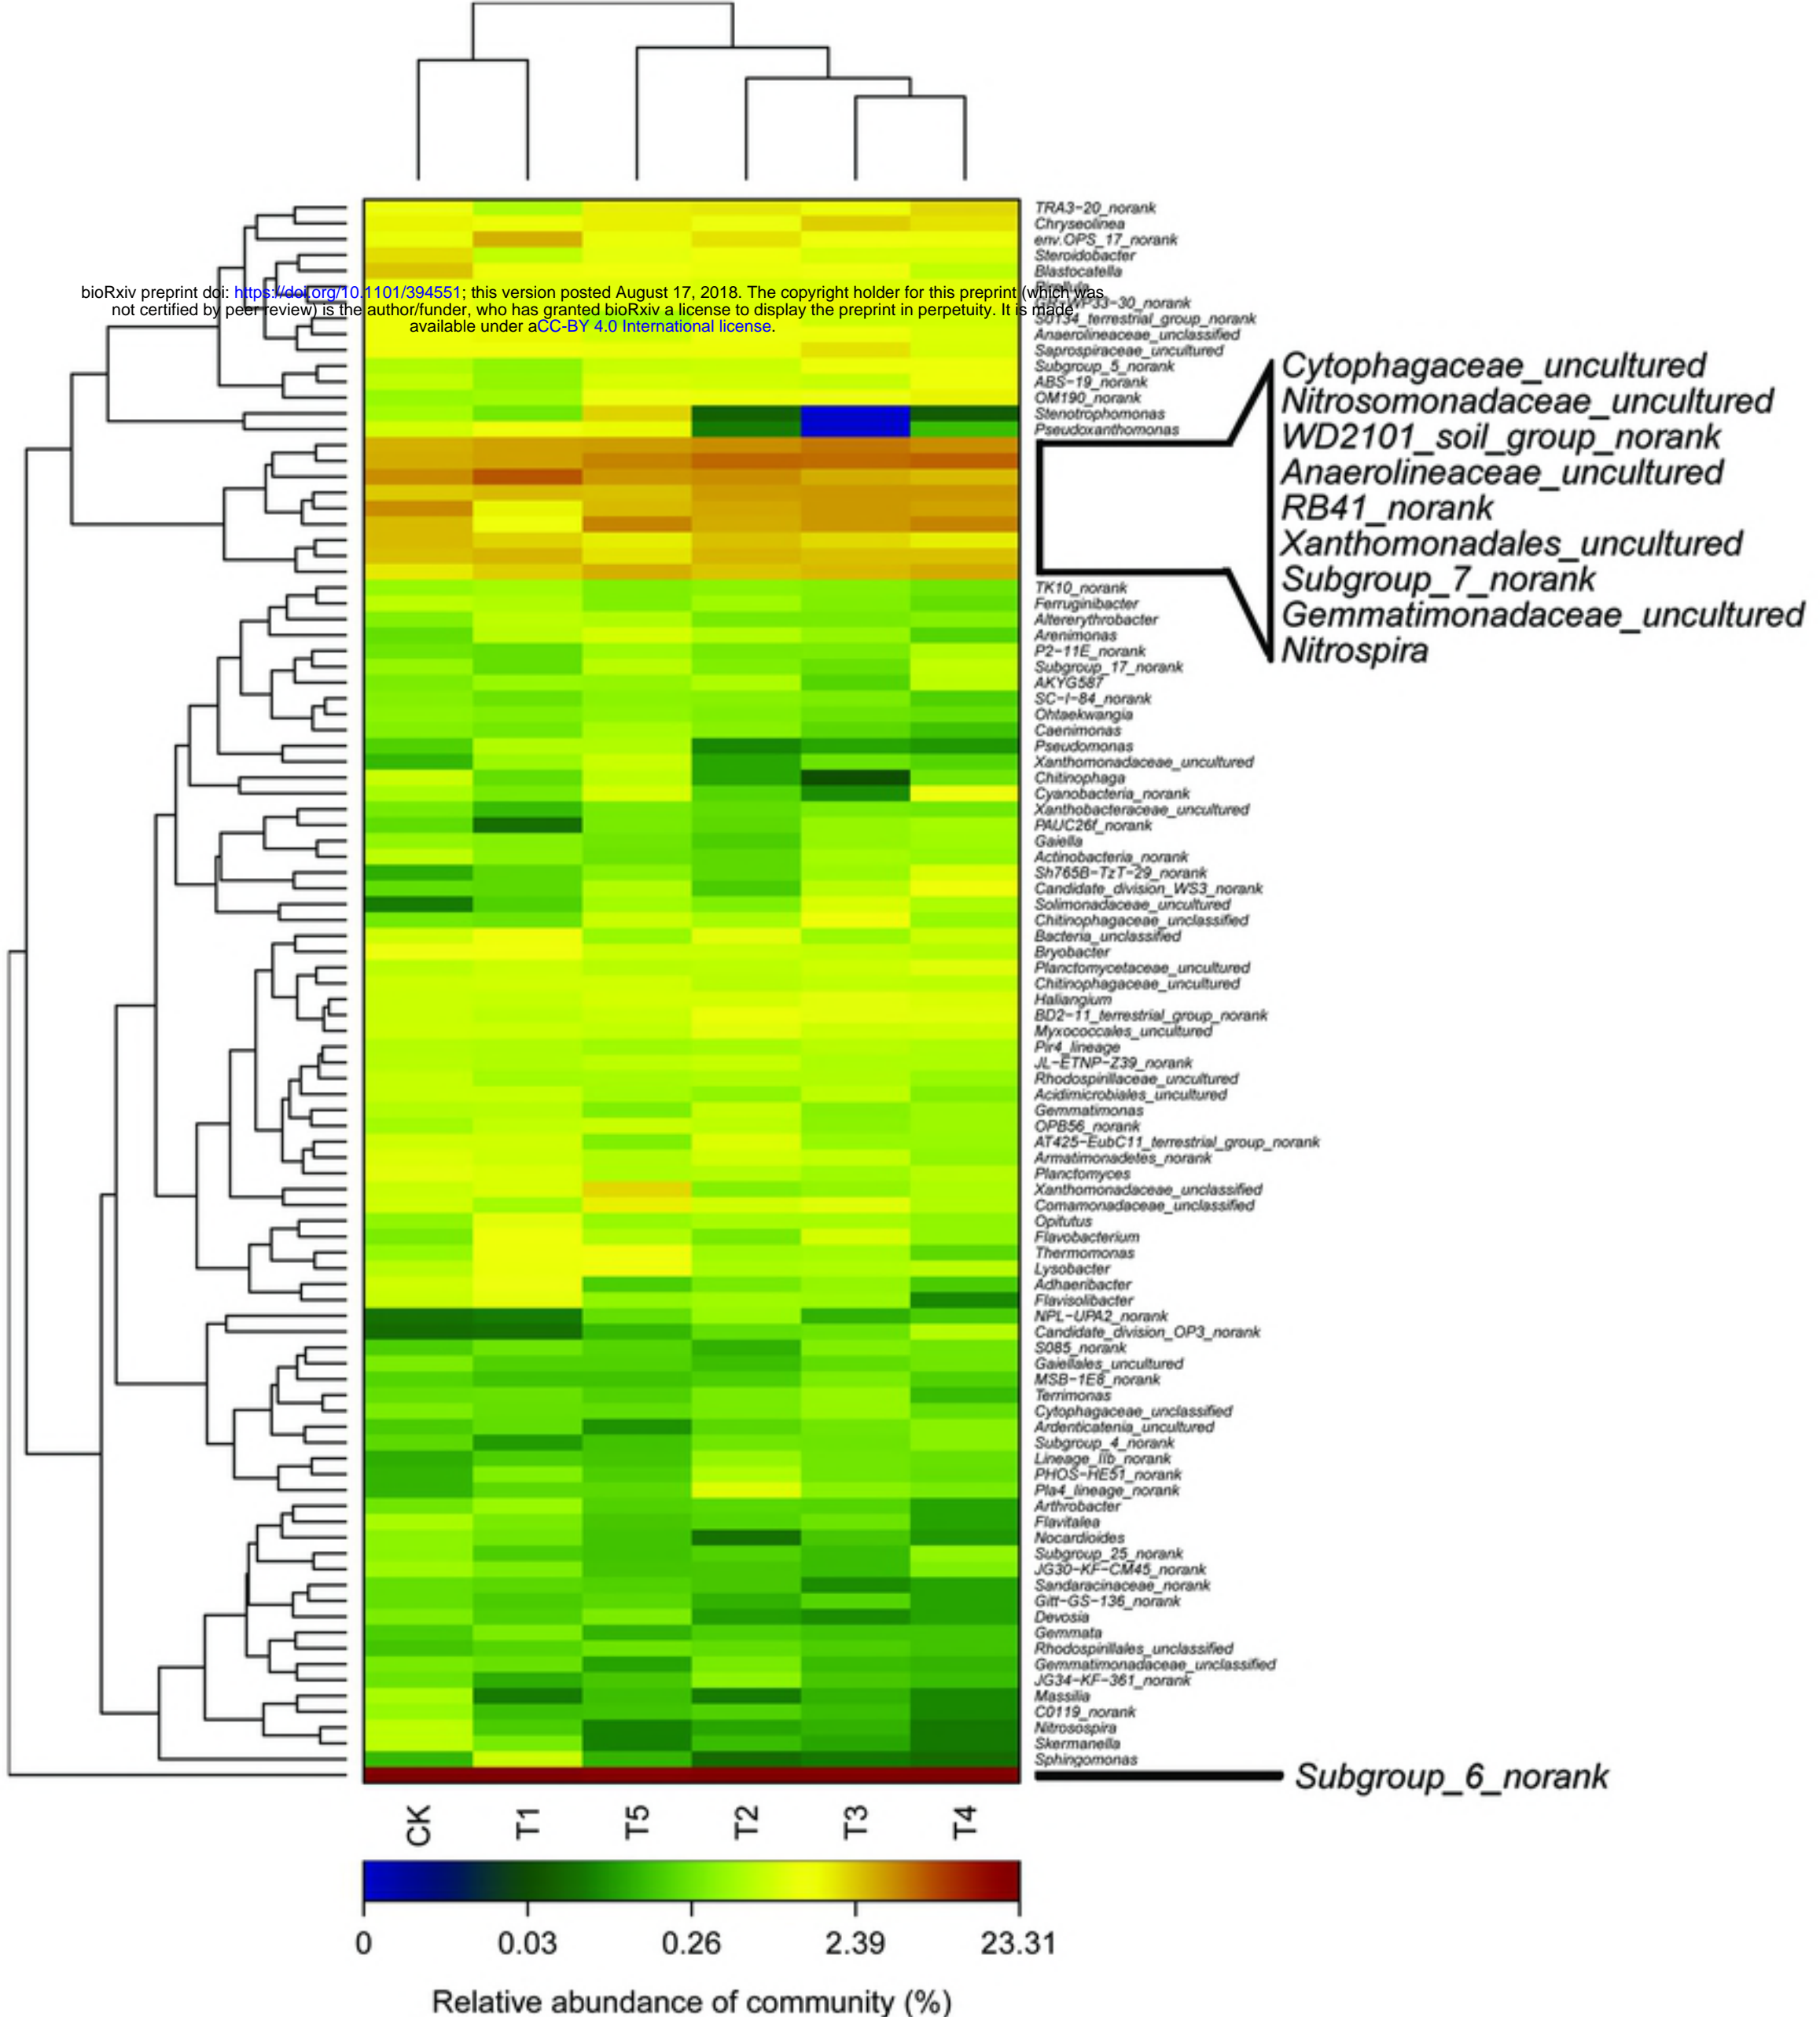

PCA

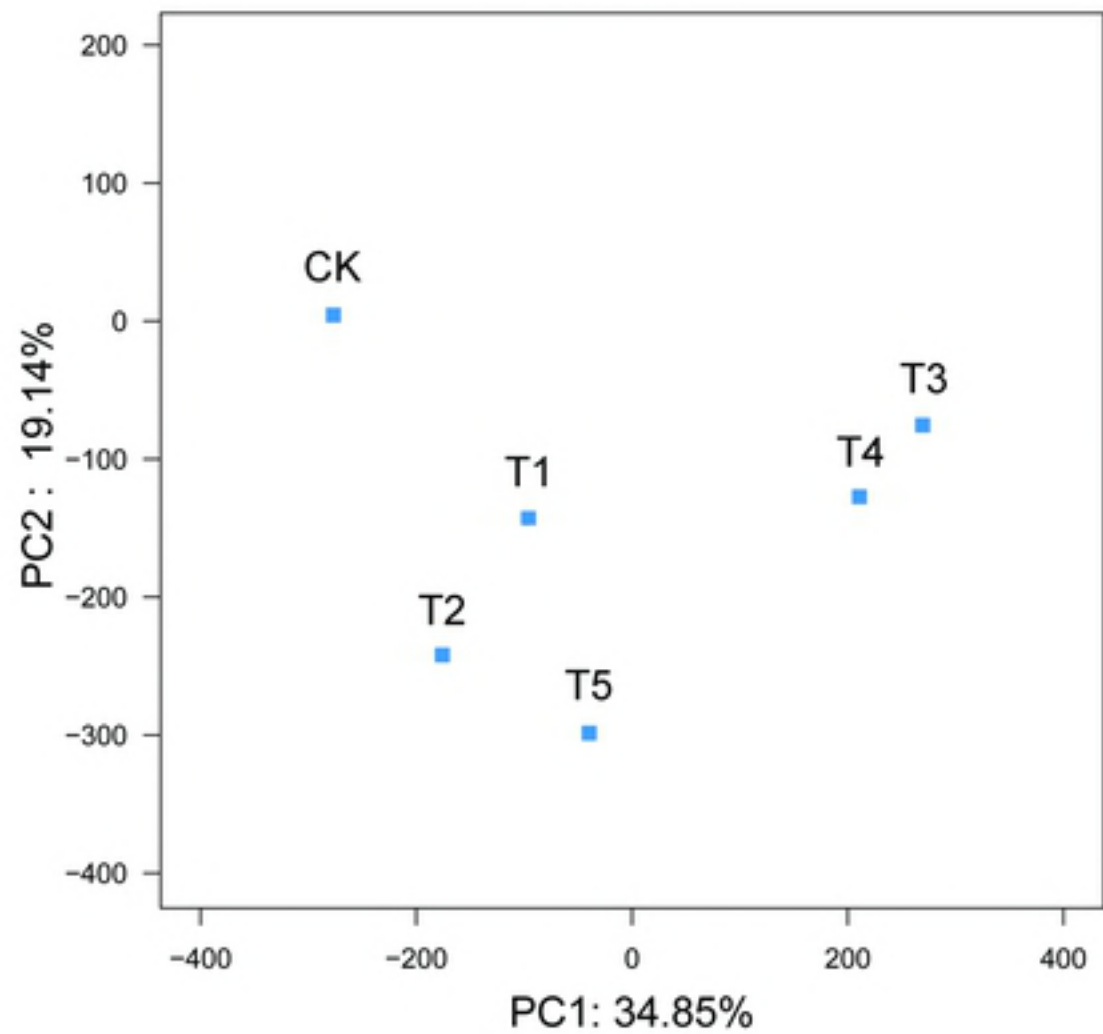

PCA

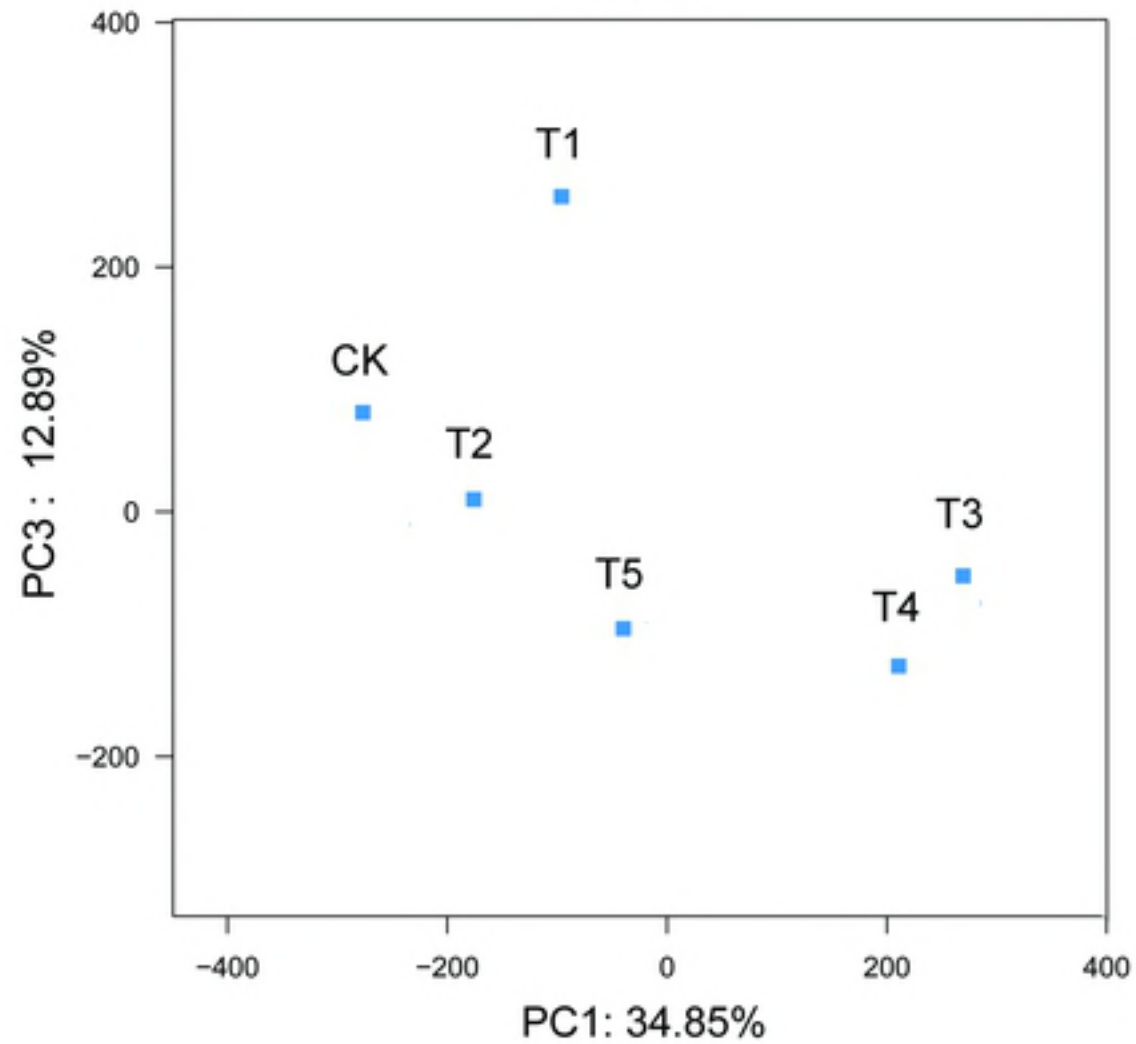

2013 2014

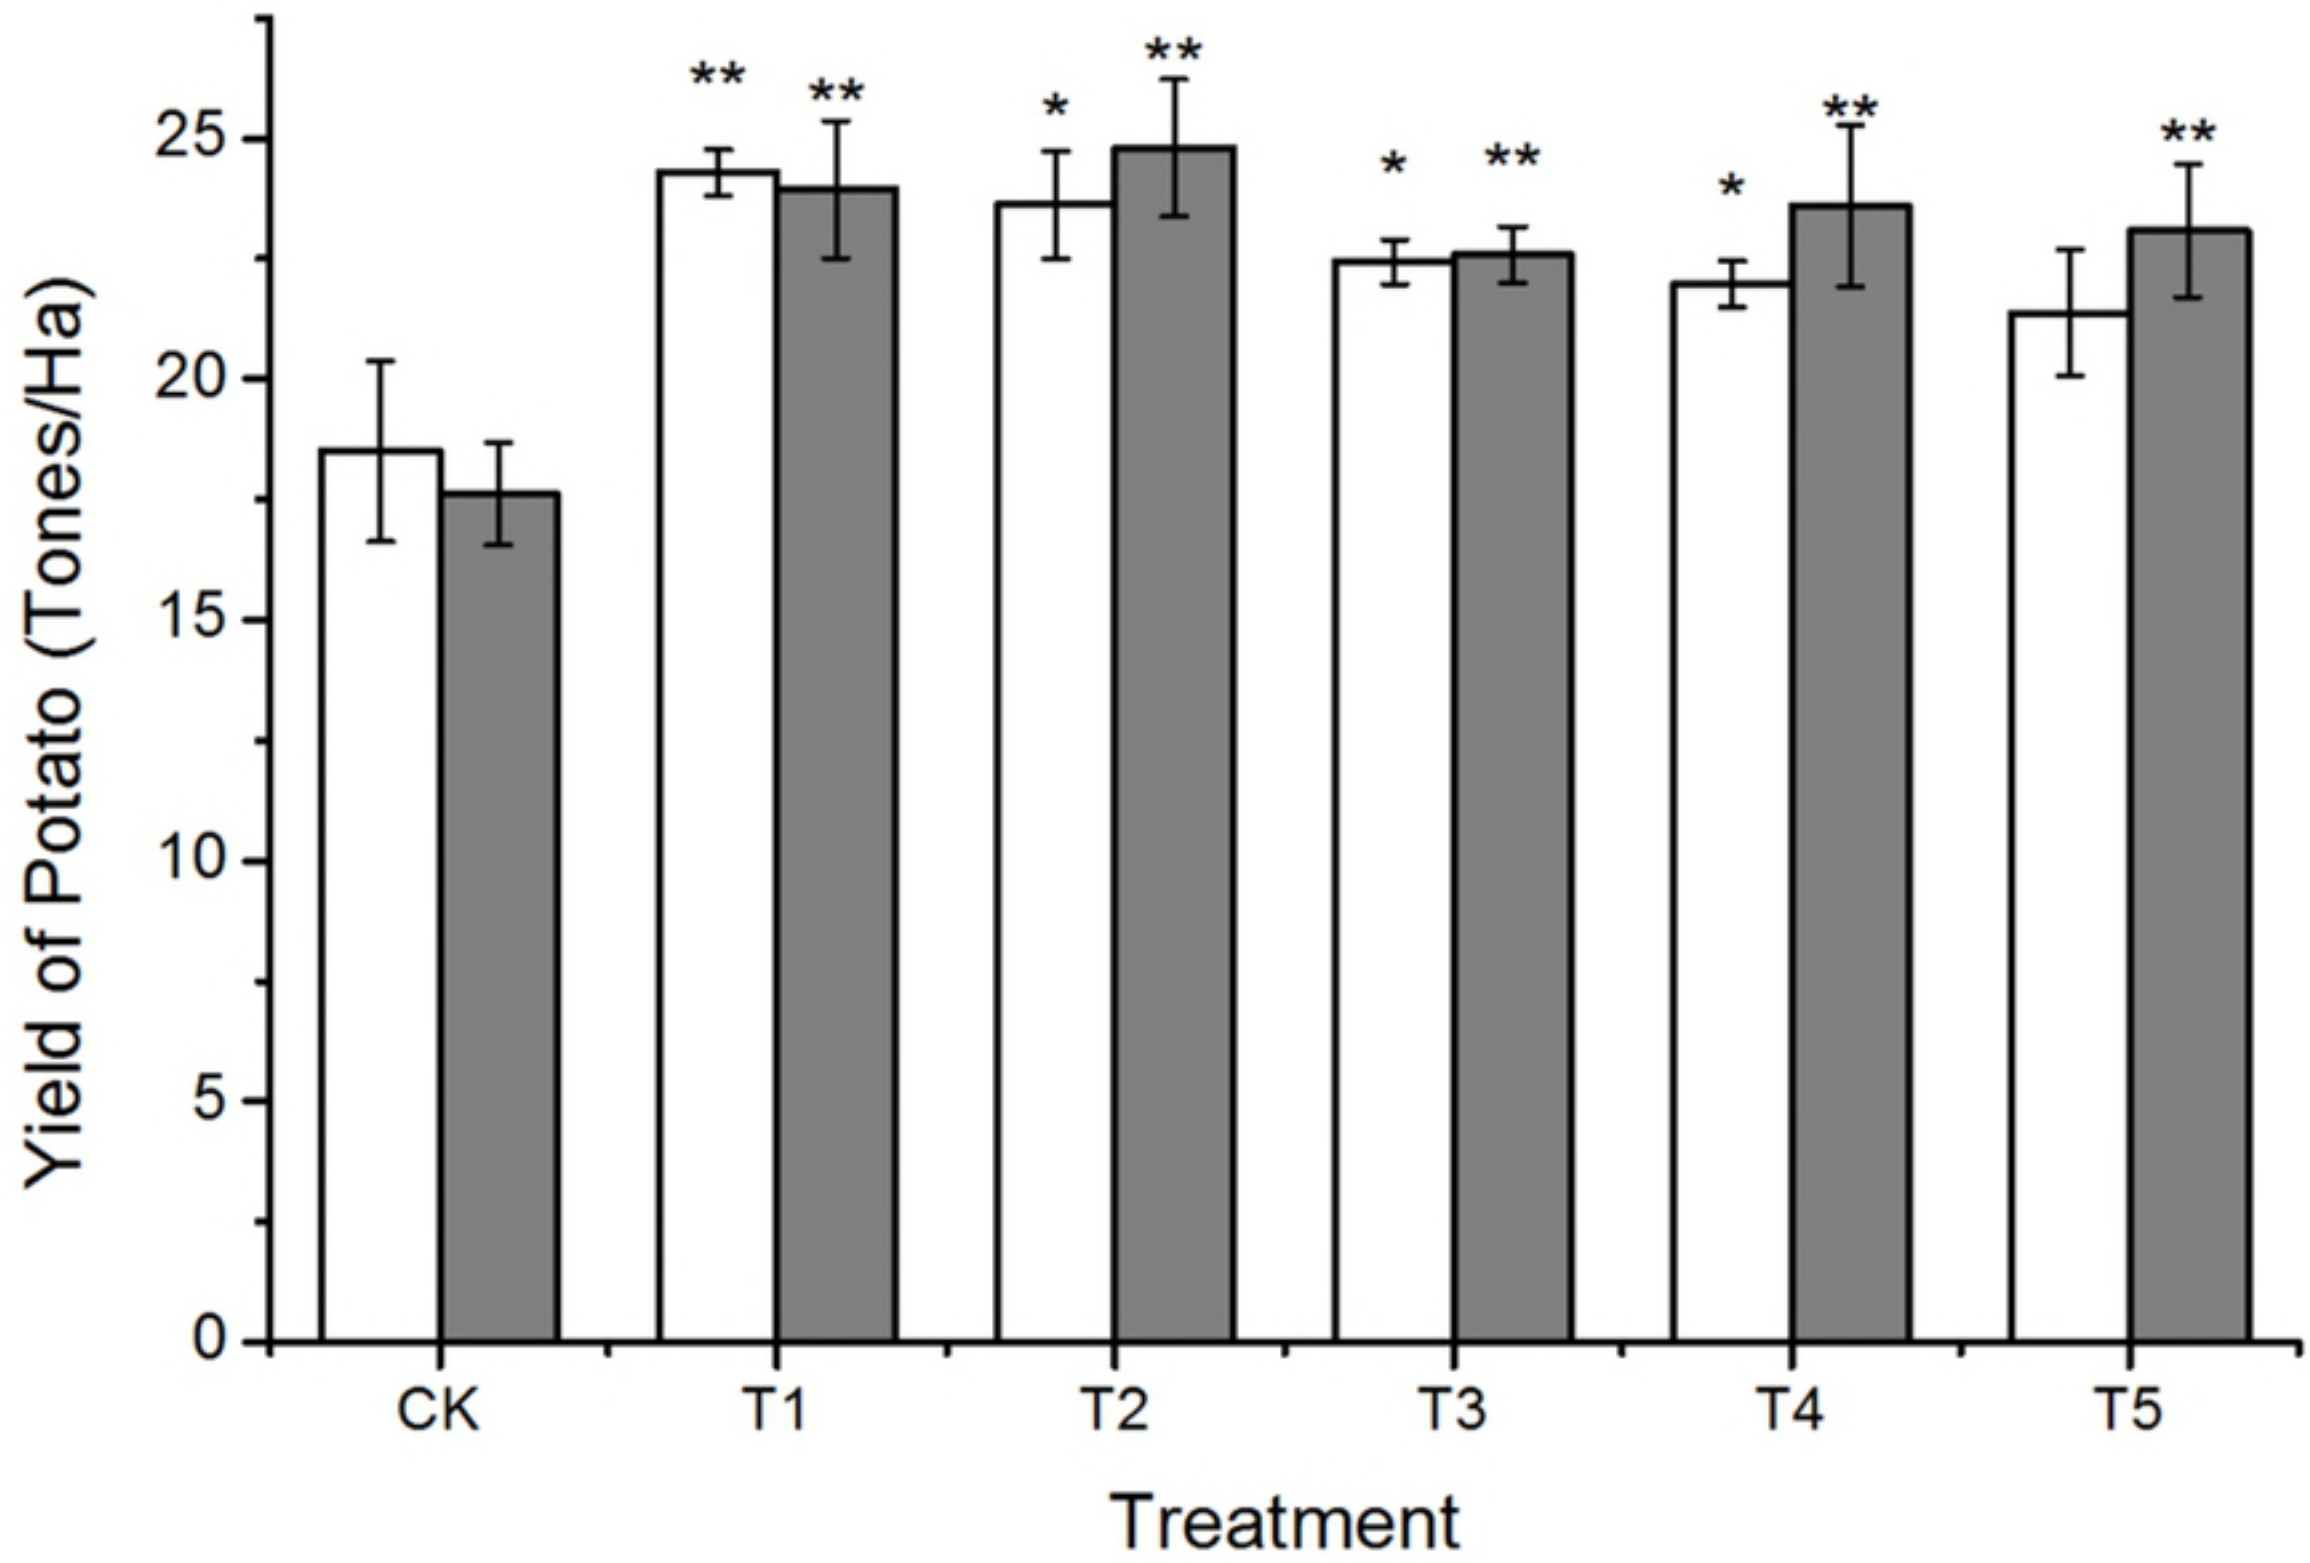

Source: http://biorxiv.org/content/10.1101/394551v1.full.pdf
